# Supplementary material for: Identification of ORC1/CDC6-Interacting Factors in Trypanosoma brucei Reveals Critical Features of Origin Recognition Complex Architecture
Source: PubMed Central journal article supplement (PMC3297607; doi:10.1371/journal.pone.0032674), 2012-03-08

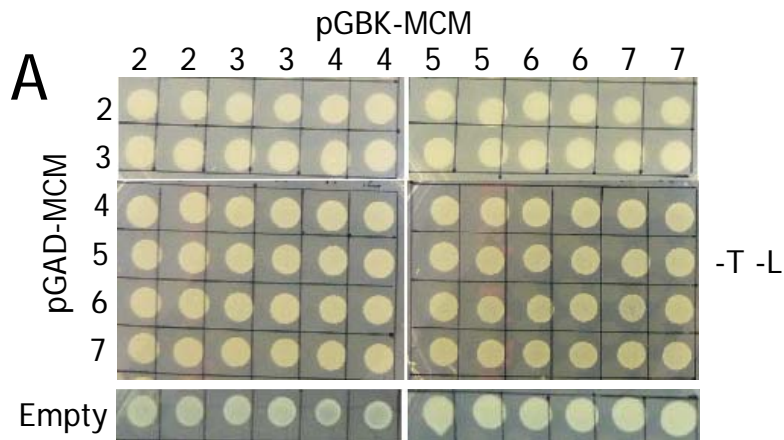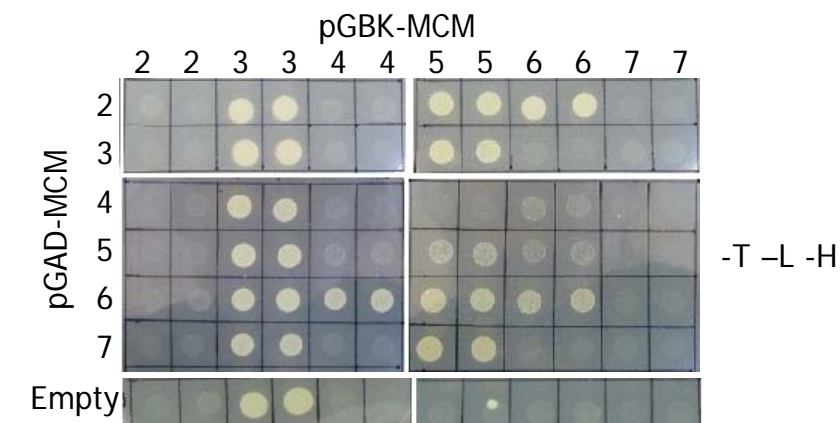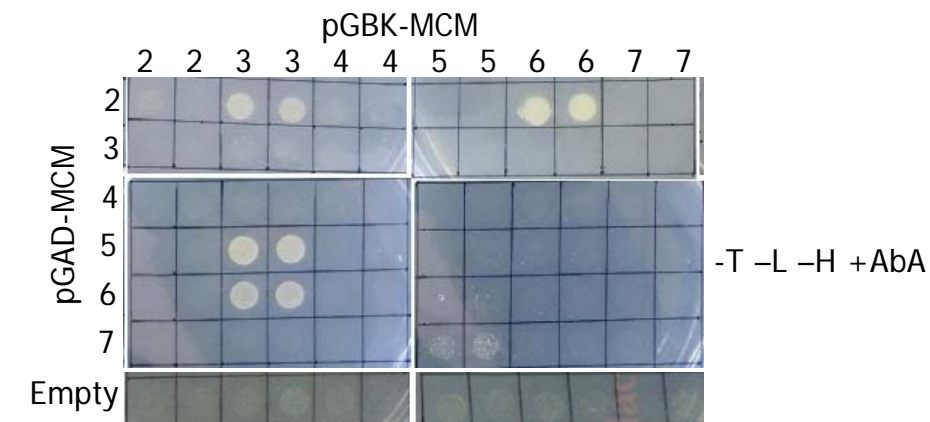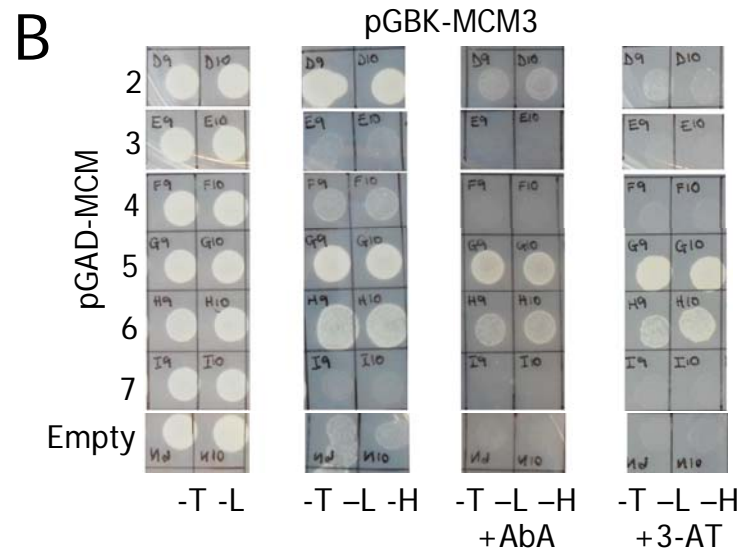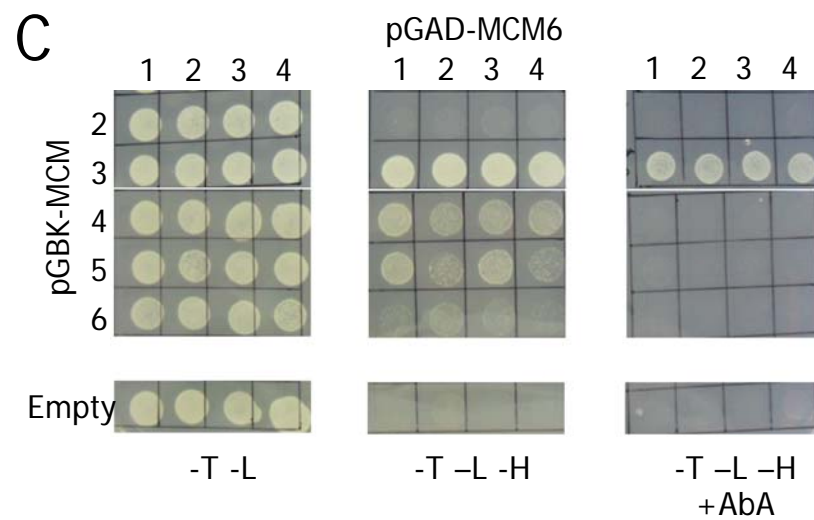

Supplement: pone.0032674.s001.pdf [file pone.0032674.s001.pdf]
