# Supplementary material for: Identification of ORC1/CDC6-Interacting Factors in Trypanosoma brucei Reveals Critical Features of Origin Recognition Complex Architecture
Source: PubMed Central journal article supplement (PMC3297607; doi:10.1371/journal.pone.0032674), 2012-03-08
Supplement: pone.0032674.s007.pdf [file pone.0032674.s007.pdf]

**Identification of ORC1/CDC6-interacting factors in *Trypanosoma brucei* reveals critical features of Origin Recognition Complex architecture**

**Calvin Tiengwe<sup>1</sup>, Lucio Marcello<sup>1</sup>, Helen Farr<sup>2</sup>, Catarina Gadelha<sup>2,3</sup>, Richard Burchmore<sup>4</sup>, J. David Barry<sup>1</sup>, Stephen D. Bell<sup>2</sup> and Richard McCulloch<sup>1\*</sup>**

1.University of Glasgow, College of Medical Veterinary and Life Sciences, Institute of Infection, Immunity and Inflammation, The Wellcome Trust Centre for Molecular Parasitology, Sir Graeme Davies Building, 120 University Place, Glasgow, G12 8TA, U.K.

2.University of Oxford, Sir William Dunn School of Pathology, South Parks Road, Oxford, OX1 3RE, U.K.

3.Present address: Department of Pathology, University of Cambridge, Tennis Court Road, Cambridge, CB2 1QP,U.K.

4.University of Glasgow, College of Medical Veterinary and Life Sciences, Institute of Infection, Immunity and Inflammation, Sir Henry Wellcome Functional Genomics Facility, RB227B Level B2, Joseph Black Building, Glasgow, G12 8QQ, U.K.

Running title: Origin Recognition Complex factors in *Trypanosoma brucei*

Keywords: trypanosome; replication; origin; origin recognition complex; pre-replication complex; MCM helicase

\*Address correspondence to: Richard McCulloch. Tel: 0(44)141-330-5946. Fax: 0(44)141-330-5422).  
Email: [richard.mcculloch@glasgow.ac.uk](mailto:richard.mcculloch@glasgow.ac.uk)

**Accession, or genome identification, numbers for the putative Origin Recognition Complex subunits used in this study.**

**1. Excavata.**

|                                       |                                                                                                                       |
|---------------------------------------|-----------------------------------------------------------------------------------------------------------------------|
| <i>Trichomonas vaginalis</i>          | ( <a href="http://trichdb.org/trichdb/">http://trichdb.org/trichdb/</a> )                                             |
| Orc1                                  | TVAG_340580                                                                                                           |
| Orc2                                  | TVAG_185790                                                                                                           |
| Orc4                                  | TVAG_365960                                                                                                           |
| Cdc6                                  | TVAG_376490                                                                                                           |
| <i>Giardia intestinalis</i> (lamblia) | ( <a href="http://giardiadb.org/giardiadb/">http://giardiadb.org/giardiadb/</a> )                                     |
| Orc1/Cdc6                             | ctg02_20                                                                                                              |
| Orc4                                  | ctg02_3                                                                                                               |
| <i>Trypanosoma brucei</i>             | ( <a href="http://tritrypdb.org/tritrypdb/">http://tritrypdb.org/tritrypdb/</a> )                                     |
| ORC1/CDC6                             | Tb11.02.5110(EAN79686)                                                                                                |
| <i>Leishmania major</i>               | ( <a href="http://tritrypdb.org/tritrypdb/">http://tritrypdb.org/tritrypdb/</a> )                                     |
| ORC1/CDC6                             | F28.0030(CAJ04600)                                                                                                    |
| <i>Trypanosoma cruzi</i>              | ( <a href="http://tritrypdb.org/tritrypdb/">http://tritrypdb.org/tritrypdb/</a> )                                     |
| ORC1/CDC6                             | Tc00.1047053511159.20(XP_806474)                                                                                      |
| <i>Naegleria gruberi</i>              | ( <a href="http://genome.jgi-psf.org/Naegr1/Naegr1.home.html">http://genome.jgi-psf.org/Naegr1/Naegr1.home.html</a> ) |
| Orc1/Cdc6                             | jgi Naegr1 88228 LAD_fgenesHNG_pg.scaffold_35000178                                                                   |
| Orc4                                  | jgi Naegr1 45184 fgenesHS_pg.scaffold_1000274                                                                         |
| Orc2                                  | jgi Naegr1 88227 LAD_fgenesH2_pg.C_scaffold_19000304                                                                  |
| Orc6                                  | jgi Naegr1 88231 LAD_query                                                                                            |

**2. Chromalveolata**

|                                 |                                                                                                                       |
|---------------------------------|-----------------------------------------------------------------------------------------------------------------------|
| <i>Thalassiosira pseudonona</i> | ( <a href="http://genome.jgi-psf.org/Thaps3/Thaps3.home.html">http://genome.jgi-psf.org/Thaps3/Thaps3.home.html</a> ) |
| Orc1a                           | Thaps3 263879 thaps1_ua_kg.chr_12000030                                                                               |
| Orc1b (Cdc6b)                   | fgenesH1_pg.C_chr_6000022 [Thaps3:5867]                                                                               |
| Orc2                            | jgi Thaps3 260866 thaps1_ua_kg.chr_1000126                                                                            |
| Cdc6                            | jgi Thaps3 8536 fgenesH1_pg.C_chr_10000306                                                                            |
| <i>Cryptosporidium parvum</i>   | ( <a href="http://cryptodb.org/cryptodb/">http://cryptodb.org/cryptodb/</a> )                                         |
| Orc1                            | cgd4_4320                                                                                                             |
| Orc2                            | cgd4_1930                                                                                                             |
| Orc4                            | cgd2_1550                                                                                                             |
| Orc5                            | cgd4_430                                                                                                              |
| Cdc6                            | cgd7_2310                                                                                                             |
| <i>Theileria annulata</i>       | ( <a href="http://old.genedb.org/genedb/annulata/">http://old.genedb.org/genedb/annulata/</a> )                       |
| Orc1                            | TA04740                                                                                                               |
| Orc2                            | TA19765                                                                                                               |
| Orc4                            | TA12985                                                                                                               |
| Cdc6                            | TA14555                                                                                                               |
| <i>Plasmodium falciparum</i>    | ( <a href="http://plasmodb.org/plasmo/">http://plasmodb.org/plasmo/</a> )                                             |
| Orc1                            | PFL0150w                                                                                                              |
| Orc2                            | MAL7P1.21                                                                                                             |
| Orc4                            | PF13_0189                                                                                                             |
| Orc5                            | PFB0720c                                                                                                              |
| Cdc6                            | PFE0155w                                                                                                              |
| <i>Tetrahymena thermophila</i>  | ( <a href="http://ciliate.org/index.php/home/welcome">http://ciliate.org/index.php/home/welcome</a> )                 |
| Orc1                            | 154.m00093                                                                                                            |
| Orc2                            | 104.m00101                                                                                                            |
| Orc4                            | 51.m00235                                                                                                             |
| Orc5                            | 142.m00114                                                                                                            |
| Cdc6                            | 50.m00158                                                                                                             |

### 3. Plantae

#### *Arabidopsis thaliana*

|       |           |
|-------|-----------|
| Orc1a | CAD13174  |
| Orc2  | Q38899    |
| Orc3  | AAT37463  |
| Orc4  | CAE01428  |
| Orc5  | NP_194720 |
| Orc6  | Q9ZVH3    |
| Cdc6  | CAC81074  |

### 4. Amoebozoa

#### *Entamoeba histolytica*

([http://www.sanger.ac.uk/cgi-bin/blast/submitblast/e\\_histolytica](http://www.sanger.ac.uk/cgi-bin/blast/submitblast/e_histolytica))

|      |            |
|------|------------|
| Orc1 | EHI_105150 |
| Cdc6 | EHI_192770 |

#### *Dictyostelium discoideum*

(<http://dictybase.org/>)

|      |            |
|------|------------|
| Orc1 | DDB0218435 |
| Orc2 | DDB0190652 |
| Orc3 | DDB0216767 |
| Orc4 | DDB0168430 |
| Orc5 | DDB0191826 |
| Orc6 | DDB0186183 |
| Cdc6 | DDB0203551 |

### 5. Opisthokonta

#### *Encephalitozoon uniculi*

(<http://microsporidiadb.org/micro/>)

|      |           |
|------|-----------|
| Orc1 | NP_597612 |
| Orc2 | NP_586228 |
| Orc5 | NP_597618 |
| Cdc6 | XP_955574 |

#### *Saccharomyces cerevisiae*

|      |           |
|------|-----------|
| Orc1 | P54784    |
| Orc2 | P32833    |
| Orc3 | P54790    |
| Orc4 | P54791    |
| Orc5 | P50874    |
| Orc6 | P38826    |
| Cdc6 | NP_012341 |

#### *Drosophila melanogaster*

|      |            |
|------|------------|
| Orc1 | AAF59236.1 |
| Orc2 | AAF55006.1 |
| Orc3 | AAD39472.1 |
| Orc4 | AAF47276.1 |
| Orc5 | AAF53340.1 |
| Orc6 | AAF58890.1 |

#### *Homo sapiens*

|      |           |
|------|-----------|
| Orc1 | Q13415    |
| Orc2 | Q13416    |
| Orc3 | Q9UBD5    |
| Orc4 | O43929    |
| Orc5 | O43913    |
| Orc6 | Q9Y5N6    |
| Cdc6 | NP_001245 |
